# Supplementary material for: Unveiling a novel serpinB2-tripeptidyl peptidase II signaling axis during senescence
Source: Oxford University Press journal article supplement (doi:10.1242/jcs.259513), 2022-04-25
Supplement: jcs259513supp.pdf [file jcs259513supp.pdf]

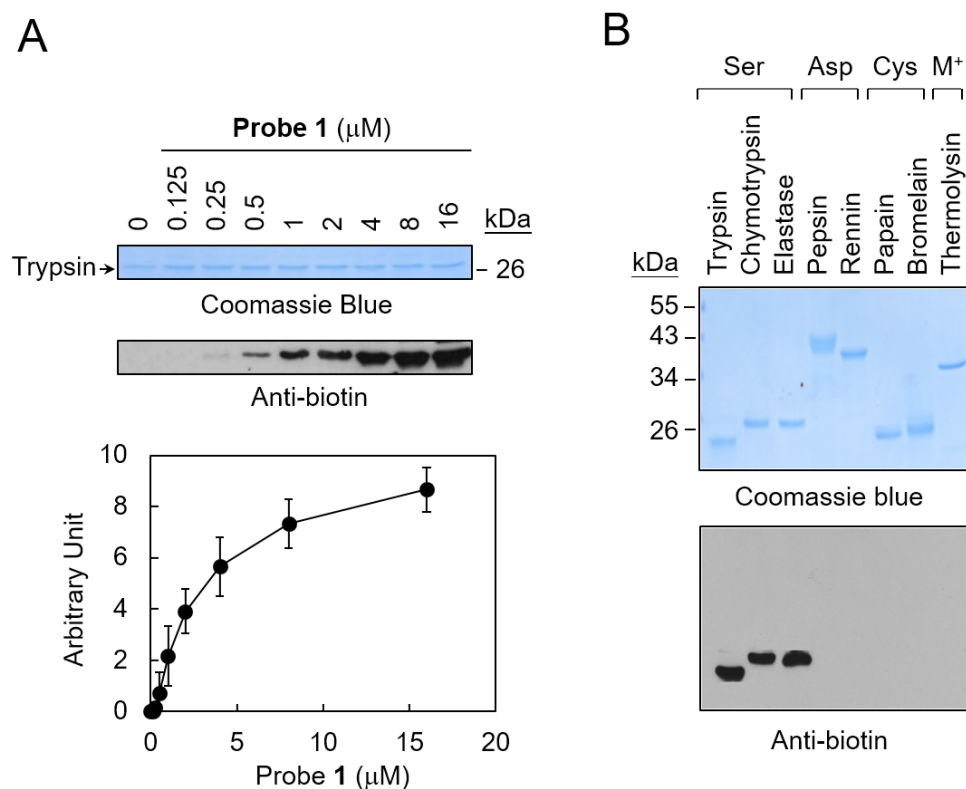

**Fig. S1.** Labeling property of probe 1. **(A)** In parallel experiments, one  $\mu\text{g}$  each of trypsin was incubated with indicated amounts of probe 1 at  $25^\circ\text{C}$  for 10 mins and separated on a 10% SDS-polyacrylamide gel. One gel was stained with Coomassie blue and the other was subjected to immunoblotting analysis using anti-biotin antibody. Quantification of the labeled proteins were plotted (bottom panels). The values were obtained from the average of three independent experiments. Error bars represent standard deviation (SD). **(B)** One  $\mu\text{g}$  each of the indicated proteases was labeled with probe 1 ( $3 \mu\text{M}$ ) at  $25^\circ\text{C}$  for 10 min. The labeled proteins were separated on a 10% SDS-polyacrylamide gel and then stained with Coomassie blue (top panel) followed by immunoblotting analysis using anti-biotin antibody (bottom panel).

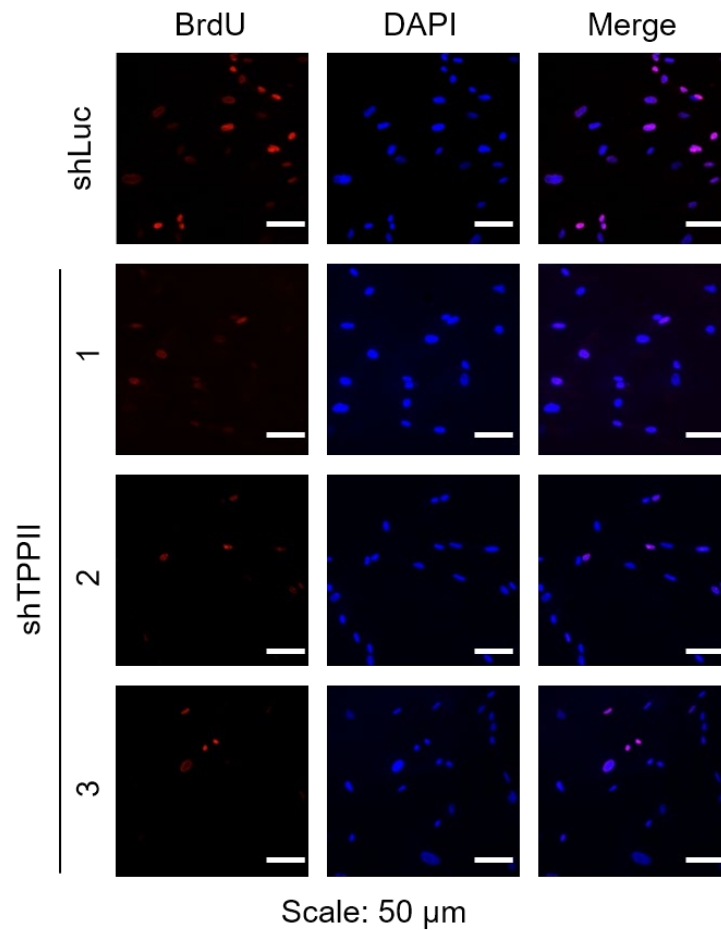

**Fig. S2.** IMR90 cells were infected with lentivirus carrying TPPII- or Luciferase-targeting shRNA sequences. Three days after infection, cells were re-seeded on cover slide. One day later, cells were incubated with 40  $\mu$ M BrdU for 16 h, fixed, and then stained with anti-BrdU antibody (red) and DAPI (blue). The scale bar represents 50  $\mu$ m.

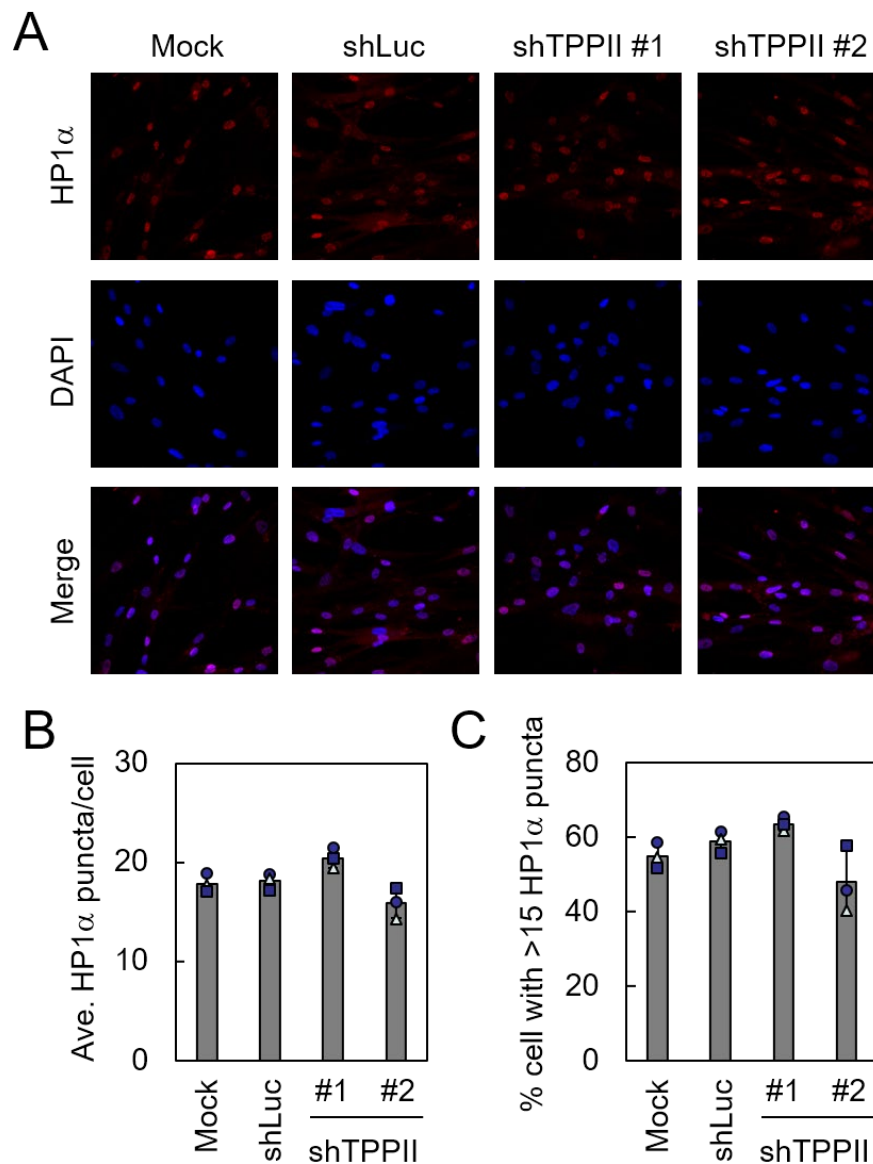

**Fig. S3.** IMR90 cells were infected with lentivirus carrying TPPII- or Luciferase-targeting shRNA sequences. (A) Three days after infection, cells were re-seeded on cover slide, fixed, and then stained with anti-HP1 $\alpha$  antibody (red) and DAPI (blue). The average numbers of HP1 $\alpha$  puncta per cell and the percentage of cells with >15 puncta were quantified in (B) and (C), respectively. Quantification results in (B, C) were conducted from the average of 3 independent experiments.

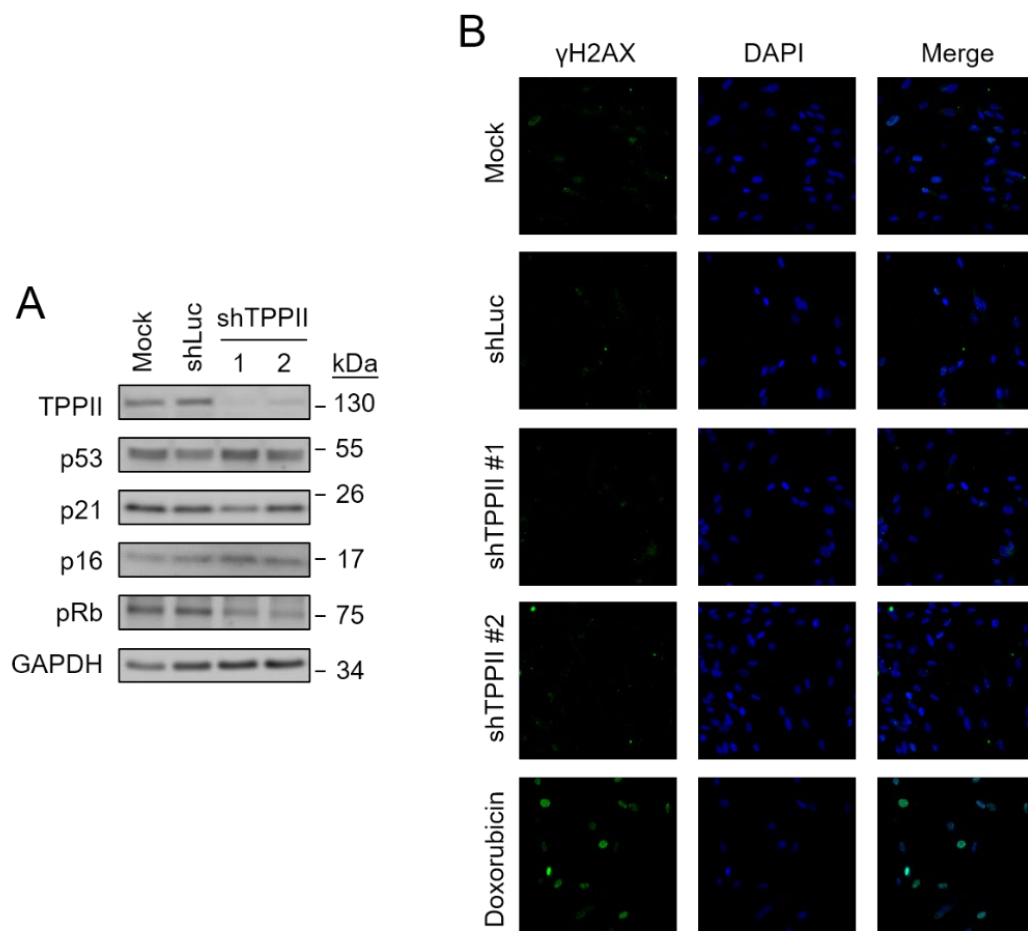

**Fig. S4.** IMR90 cells were infected with lentivirus carrying TPPII- or Luciferase-targeting shRNA sequences. (A) Cell extracts were prepared four days after infection and then analyzed by immunoblots using the indicated antibodies. (B) Immunofluorescence assays were also performed using anti- $\gamma$ H2AX antibody (green). The cell nuclei were stained with DAPI (blue).

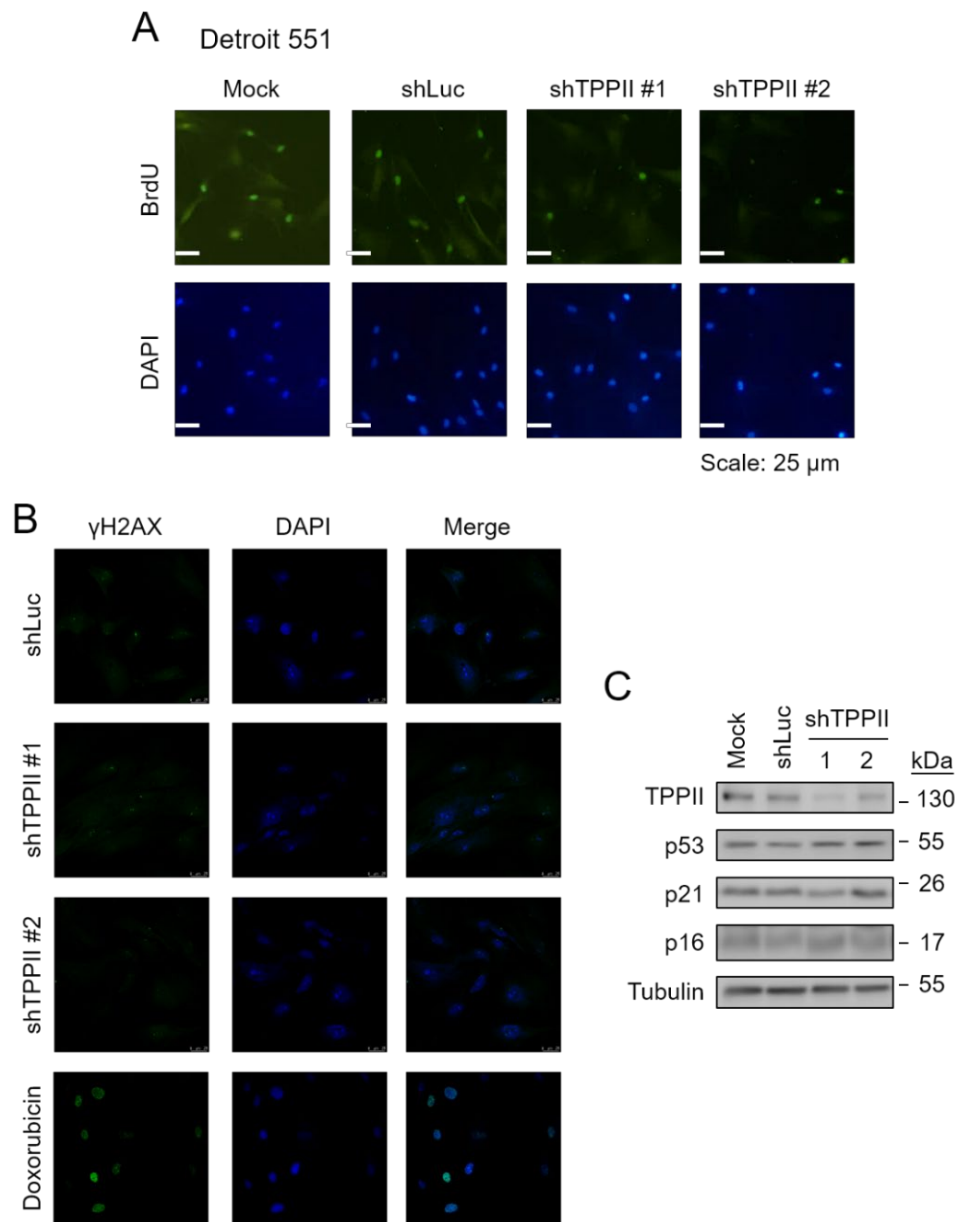

**Fig. S5.** Detroit551 cells were infected with lentivirus carrying TPPII- or Luciferase-targeting shRNA sequences. (A) Cells were incubated with 40 $\mu$ M BrdU for 16 h, fixed, and then stained with anti-BrdU antibody (green) and DAPI (blue). (B) In another experiment, cells were immunostained with anti- $\gamma$ H2AX antibody. (C) Cell extracts were prepared four days after infection and then analyzed by immunoblots using the indicated antibodies.

**Table S1. Serine hydrolases with altered activities in senescence.**

| Gene                                       | Protein Name                                                              | Ratio <sup>1)</sup> |
|--------------------------------------------|---------------------------------------------------------------------------|---------------------|
| <b><i>Increased in senescent cells</i></b> |                                                                           |                     |
| ACOT2                                      | Acyl-coenzyme A thioesterase 2                                            | 100                 |
| PREP                                       | Prolyl endopeptidase                                                      | 100                 |
| LYPLA2                                     | Lysophospholipase II/Acyl-protein thioesterase 2                          | 17.14               |
| ABHD14B                                    | Abhydrolase domain-containing protein 14B                                 | 1.98                |
| TPP1                                       | Tripeptidyl-peptidase 1                                                   | 1.92                |
| ABHD12                                     | Abhydrolase domain-containing 12/Monoacylglycerol lipase                  | 1.79                |
| LACTB                                      | Lactamase Beta/Serine beta-lactamase-like protein LACTB                   | 1.47                |
| SIAE                                       | Sialate O-acetylesterase                                                  | 1.27                |
| <b><i>Decreased in senescent cells</i></b> |                                                                           |                     |
| FASN                                       | Fatty acid synthase                                                       | 0.80                |
| TPP2                                       | Tripeptidyl-peptidase 2                                                   | 0.78                |
| ACOT1                                      | Acyl-coenzyme A thioesterase 1                                            | 0.76                |
| PNPLA6                                     | Patatin like phospholipase domain containing 6/Neuropathy target esterase | 0.75                |
| ABHD10                                     | Abhydrolase domain containing 10                                          | 0.73                |
| NCEH1                                      | Neutral cholesterol ester hydrolase 1                                     | 0.73                |
| PPME1                                      | Protein phosphatase methylesterase 1                                      | 0.70                |
| LYPLA1                                     | Lysophospholipase 1/Acyl-protein thioesterase 1                           | 0.58                |
| MGLL                                       | Monoglyceride lipase                                                      | 0.55                |
| PAFAH1B3                                   | Platelet-activating factor acetylhydrolase 1b catalytic subunit 3         | 0.52                |
| ESD                                        | Esterase D/Formylglutathione hydrolase                                    | 0.50                |
| PAFAH2                                     | Platelet-activating factor acetylhydrolase 2                              | 0.49                |
| uPA                                        | Urokinase-type plasminogen activator                                      | 0.01                |

<sup>1)</sup> Comparison of protein abundance by senescent/young cells; 100 and 0.01 represented the detection of proteins only in senescent and proliferating cells, respectively.
